# Supplementary material for: Glucose Oscillations Can Activate an Endogenous Oscillator in Pancreatic Islets
Source: PLOS journal article supplement (doi:10.1371/journal.pcbi.1005143), 2016-10-27
Supplement: S2 (10.1371/journal.pcbi.1005143.s002) [file journal.pcbi.1005143.s002]

# Supporting Information

## S1 Model Parameter Values

| Parameter                     | Value                | Parameter                      | Value                            | Parameter                     | Value                               |
|-------------------------------|----------------------|--------------------------------|----------------------------------|-------------------------------|-------------------------------------|
| $V_{\text{GLUT}}$             | 0.01 M/s             | $V_{\text{GK}}$                | 0.01 M/s                         | $V_{\text{PFK}}$              | 0.01 M/s                            |
| $k_{\text{PDH}}$              | 0.001 M/s            | $k_{\text{GLC}}^{\text{GLUT}}$ | 13 mM                            | $k_{\text{GK}}$               | 13 mM                               |
| $h_{\text{GK}}^{\text{GLC}}$  | 4                    | $k_{\text{GPI}}$               | 3.3                              | $k_{\text{PFK}}$              | 0.06                                |
| $K_{\text{PFK}}^{\text{AMP}}$ | 30 $\mu\text{M}$     | $K_{\text{PFK}}^{\text{FBP}}$  | 1 $\mu\text{M}$                  | $K_{\text{PFK}}^{\text{F6P}}$ | 50 $\mu\text{M}$                    |
| $K_{\text{PFK}}^{\text{ATP}}$ | 0.1 $\mu\text{M}$    | $f_{\text{AMP}}$               | 0.02                             | $f_{\text{FBP}}$              | 0.2                                 |
| $f_{\text{MT}}$               | 20                   | $f_{\text{BT}}$                | 20                               | $f_{\text{ATP}}$              | 20                                  |
| $k_{\text{LG}}$               | 0.3                  | $V_{\text{ANT}}$               | 1 $\text{s}^{-1}$                | $k_{\text{hyd},\text{bas}}$   | $3.3 \times 10^{-3} \text{ s}^{-1}$ |
| $k_{\text{hyd}}^{\text{Ca}}$  | 0                    | $k_{\text{ANT}}$               | 1                                | $k_{\text{ANT}}^{\text{PDH}}$ | 2.2                                 |
| $V_{\text{ANT}}^{\text{PDH}}$ | 0.05 M/s             | $k_{\text{ANT}}^{\text{Ca}}$   | $3.5 \times 10^{-4} \mu\text{M}$ | $A_{\text{tot}}$              | 3 mM                                |
| $V_{\text{Ca}}$               | 25 mV                | $V_{\text{K}}$                 | -75 mV                           | $g_{\text{Ca}}(V)$            | 1 nS                                |
| $g_{\text{K}}(V)$             | 2.7 nS               | $g_{\text{K}}(\text{Ca})$      | 50 pS                            | $g_{\text{K}}(\text{ATP})$    | 25.5 nS                             |
| $v_{\text{Ca}}(V)$            | -20 mV               | $v_{\text{K}}(V)$              | -16 mV                           | $k_{\text{K}}(\text{Ca})$     | 0.5 $\mu\text{M}$                   |
| $h_{\text{Ca}}(V)$            | 0.08                 | $h_{\text{K}}(V)$              | 0.2                              | $h_{\text{K}}(\text{Ca})$     | 2                                   |
| $\tau_{\text{K}}(V)$          | 20 ms                | $C_{\text{m}}$                 | 5.3 pF                           | $k_{\text{dd}}$               | 17 $\mu\text{M}$                    |
| $k_{\text{td}}$               | 26 $\mu\text{M}$     | $k_{\text{tt}}$                | 1 $\mu\text{M}$                  | $k_{\text{cyt}}^{\text{Ca}}$  | 0.01                                |
| $k_{\text{ER}}^{\text{Ca}}$   | 0.01                 | $k_{\text{ER},\text{in}}$      | 0.46 $\text{s}^{-1}$             | $k_{\text{ER},\text{out}}$    | 0.02 $\text{s}^{-1}$                |
| $k_{\text{PM}}$               | 0.23 $\text{s}^{-1}$ | $I_{\text{slope}}$             | 1 A.U./nM                        | $C_{\text{thr}}$              | 0.22 $\mu\text{M}$                  |
| $\tau_{\text{G}}$             | 50 s                 | $G_{\text{min}}$               | 8 mM                             | $G_{\text{max}}$              | 14 mM                               |
| $I_{1/2}$                     | 30 A.U.              | $S_{\text{G}}$                 | 50 A.U.                          |                               |                                     |

**S1 Table. Model parameter values.**

Parameter values of the Dual Oscillator Model used for all simulations and parameter values for the closed loop system used in Fig. 12.
